# Supplementary material
Source: ML conference proceedings conference paper supplement (https://www.ecva.net/papers/eccv_2020/papers_ECCV/html/123720307_ECCV_2020_paper.php)
Supplement: Supplementary file 2 [file 123720307-supp.zip]

Archive with 9 entries (9 files):
- 01_birdhouse_turntable.avi
- 02_unicorn_turntable.avi
- 03_hand_gesture.avi
- 04_waving_cloth.avi
- 05_paper_stripe.avi
- 06_rotating_over_a_house.avi
- 07_spaceshuttle_simulation.avi
- 5744-supp.pdf
- readme.txt
