# Supplementary material
Source: ML conference proceedings conference paper supplement (https://www.ecva.net/papers/eccv_2020/papers_ECCV/html/123720307_ECCV_2020_paper.php)
Supplement: Supplementary file 2 [file 123720307-supp.zip › readme.txt]

5744-supp.pdf: supplementary document

Videos:
01_birdhouse_turntable.avi: static biradhourse scene (experiment).
02_unicorn_turntable.avi: static unicorn scene (experiment).
03_hand_gesture.avi: dynamic hand gustures with a fixed camera (experiment).
04_waving_cloth.avi: dynamic waving cloth with a fixed camera (experiment).
05_paper_stripe.avi: dynamic paper stripe with a moving camera (experiment).
06_rotating_over_a_house.avi：a camera is rotating over a staic house (simulation).
07_spaceshuttle_simulation.avi: two cameras are looking at a rotating space shuttle (simulation).
